# Supplementary material for: Perception, knowledge, and attitudes towards molar incisor hypomineralization among Spanish dentists: a cross-sectional study
Source: Springer Nature journal article supplement (doi:10.1186/s12903-020-01249-6), 2020-09-18
Supplement: MOESM1 [file 18394312]

# Perception, knowledge and attitudes towards molar incisor hypomineralization among spanish dentists: a cross-sectional study.

Clara Serna-Muñoz, Yolanda Martínez-Beneyto, Amparo Pérez-Silva, Andrea Poza-Pascual, Francisco Javier Ibáñez-López, Antonio José Ortiz-Ruiz.

1. Age group

*Tick one option*

- < 30
- 31-40
- 41-50
- >51

2. Years of practice

*Tick one option*

- <5
- 6-10
- 11-15
- >15

3. Sector of work

*Tick one option*

- Public sector
- Private sector
- Both

4. Qualification

*Tick one option*

- Stomatologist
- Licensed
- Graduate

5. What is your main area of work?

*Choose the corresponding answers*

- Pediatric dentistry
- General dentistry
- Surgery
- Orthodontics
- Root canal
- Aesthetic
- Others

6. Do you usually see this type of lesions in your practice?

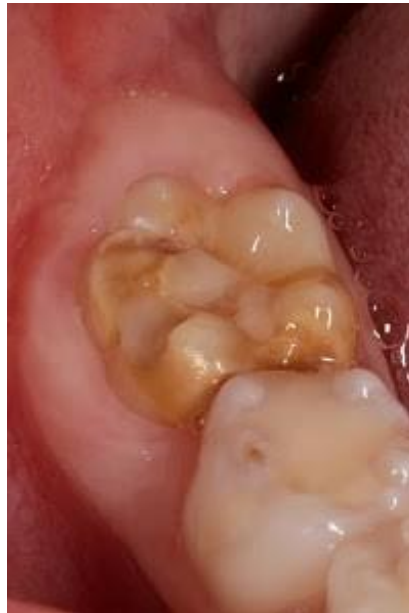

*Tick one option*

- Yes
- No

7. Do you usually see this type of lesions in your practice?

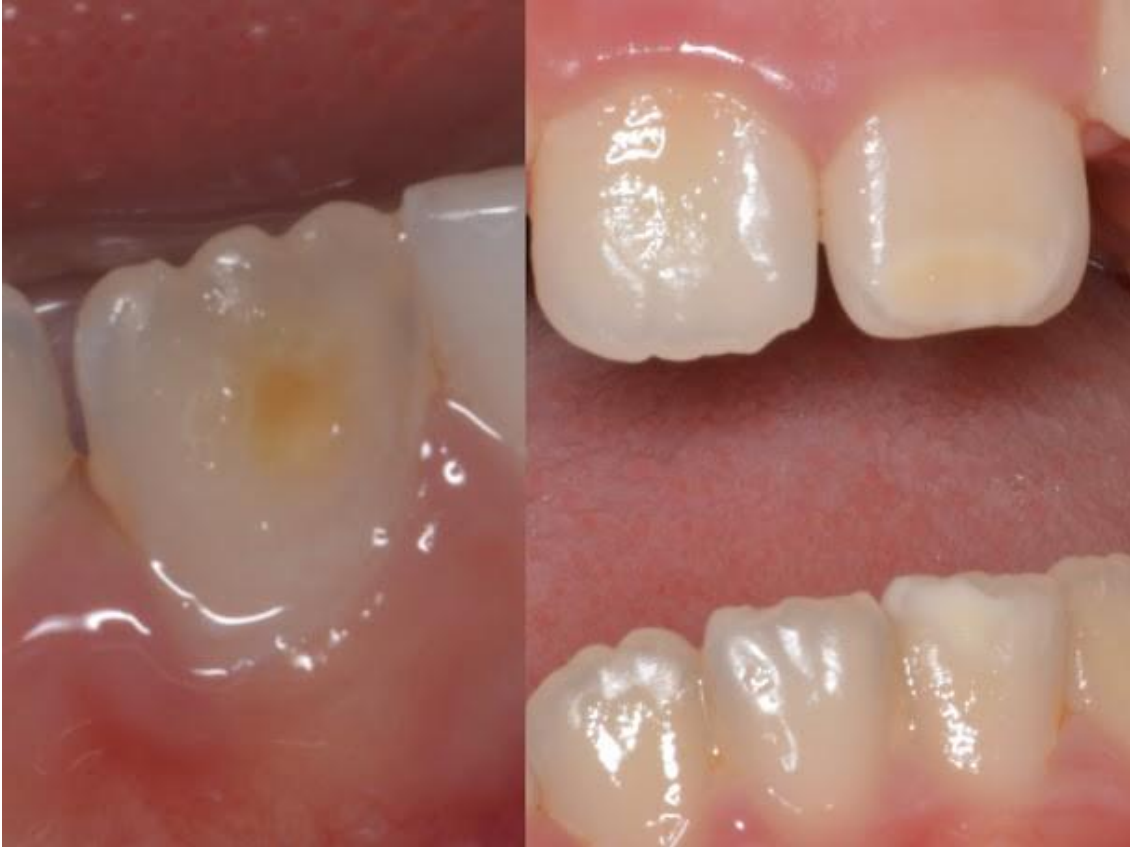

*Tick one option*

- Yes
- No

8. How often do you see them?

*Tick one option*

- Weekly
- Monthly
- Annually

9. Approximately how many of your patients present these lesions?

*Tick one option*

- <10%
- 10-25%
- >25%

10. In your practice, have you noted that the incidence of MIH has risen in recent years?

*Tick one option*

- Yes
- No

11. With respect to the severity of the defect. Which of the following lesions do you see most often in clinical practice?

*Tick one option*

- White-cream opacity
- Yellow-brown opacity
- Post-eruptive enamel fracture

12. How often do you observe these lesions in the second temporary molar in comparison with the first permanent molar?

*Tick one option*

- More often
- Equally as often
- Less often

13. Which factors do you believe are involved in the etiology of MIH?

*Choose the corresponding answers*

- Genetics
- Medicines taken by the pregnant mother
- Chronic medical condition that affects the pregnant mother
- Acute medical condition that affects the pregnant mother
- Fluoride
- Environmental pollutants
- Chronic medical condition that affects the child
- Acute medical conditions that affects the child
- Medicines taken by the child
- All the above
- Others
- Don't know/No opinion

14. Do you believe the management of MIH is a challenge?

*Tick one option*

- Yes, very difficult
- Yes, somewhat difficult
- No

15. If you answered yes to the previous question, where do you think the greatest difficulties lie?

*Choose the corresponding answers*

- Diagnosis
- Aesthetics
- Anesthesia management
- Correct determination of the margins of the tooth affected  
Providing correct restoration
- Long-term success of the restoration
- Behavior of the child
- All the above
- Other

16. Which factors influence the choice of restoration material in these cases?

*Choose the corresponding answers*

- Aesthetics
- Adhesion
- Preference of patient or parents
- Durability
- Potential for remineralization
- Sensitivity
- Personal experience
- Research results
- Others

17. Which materials would you use to restore these molars if they present post-eruptive fracture?

*Choose the corresponding answers*

- Pure glass ionomers
- Resin-reinforced ionomers
- Compomers
- Flowable composite
- Composite
- Stainless steel crowns
- Amalgams
- Inlays and onlays
- Silver diamine fluoride
- Others

18. Which materials would you use to restore these molars if they do NOT present post-eruptive fracture but only opacities?

*Choose the corresponding answers*

- Pure glass ionomers
- Resin-reinforced ionomers
- Compomers
- Flowable composite
- Composite
- Stainless steel crowns
- Amalgams
- Inlays and onlays
- Silver diamine fluoride
- Others

19. Which materials would you use to restore hypomineralized incisors?

*Choose the corresponding answers*

- Pure glass ionomers
- Resin-reinforced ionomers
- Compomers
- Flowable composite
- Composite
- Stainless steel crowns
- Amalgams
- Inlays and onlays
- Silver diamine fluoride
- Resin infiltrations
- Others

20. Are you receiving any information on MIH?

*Tick one option*

- Yes
- No

21. Where do you obtain the information?

*Tick one option*

- Dental journals
- Continuing education
- Brochures
- Internet
- Books
- Other

22. Would you like to receive more information on hypomineralization?

*Tick one option*

- Yes
- No

23. What do you need more information on?

*Tick one option*

- Etiology
- Diagnosis
- Treatment
- All



24. Clinical case. Seven-year-old patient with 3.6 semi-erupted and post-eruptive enamel fracture and sensitivity in the tooth. Which treatment option do you consider the best?

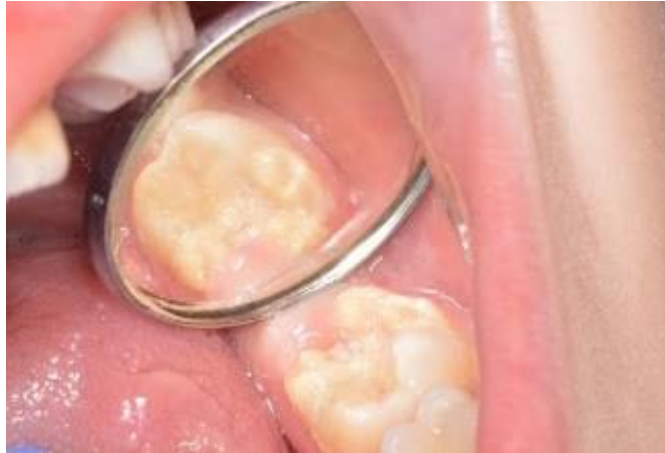

*Tick one option*

- Fluoride varnish
- Restoration with glass ionomer
- Restoration with composite
- Extraction
- I am not sure of the best option

25. Clinical case. Which treatment option do you consider the best?

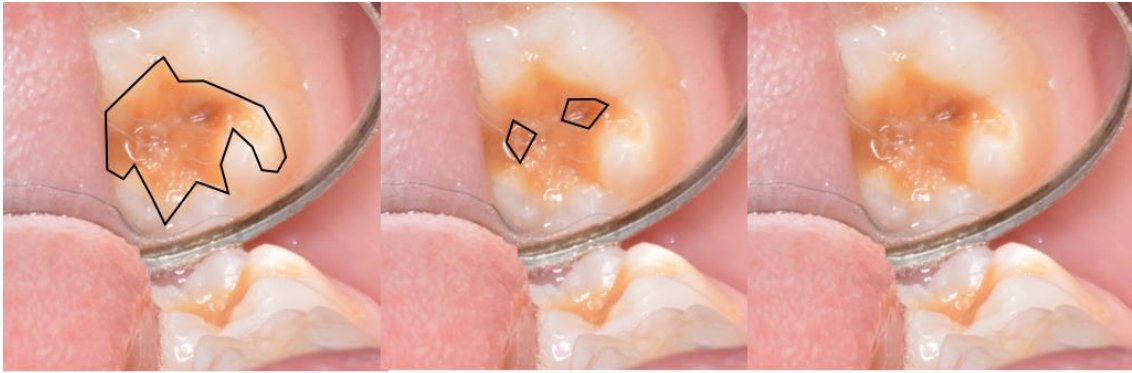

|                                                                                      |                                                                                      |                                                                                      |
|--------------------------------------------------------------------------------------|--------------------------------------------------------------------------------------|--------------------------------------------------------------------------------------|
| 1. Eliminate all tissue affected by MIH until the healthy margin is reached          | 2. Eliminate only the most affected tissue                                           | 3. Do not eliminate any dental tissue                                                |
| a. Composite restoration<br>b. Glass Ionomer Restoration<br>c. Temporary restoration | a. Composite restoration<br>b. Glass Ionomer Restoration<br>c. Temporary restoration | a. Composite restoration<br>b. Glass Ionomer Restoration<br>c. Temporary restoration |

*Choose the corresponding answers*

- 1.a
- 1.b
- 1.c
- 2.a
- 2.b
- 2.c
- 3.a
- 3.b
- 3.c
